# Supplementary figures and images for: Carer strain in post-stroke emotionalism: a cross-sectional analysis
Source: PubMed Central journal article supplement — BMJ Open. 2024 Dec 23;14(12):e084079. doi: 10.1136/bmjopen-2024-084079 (PMC11667378; doi:10.1136/bmjopen-2024-084079), 2024-12-23

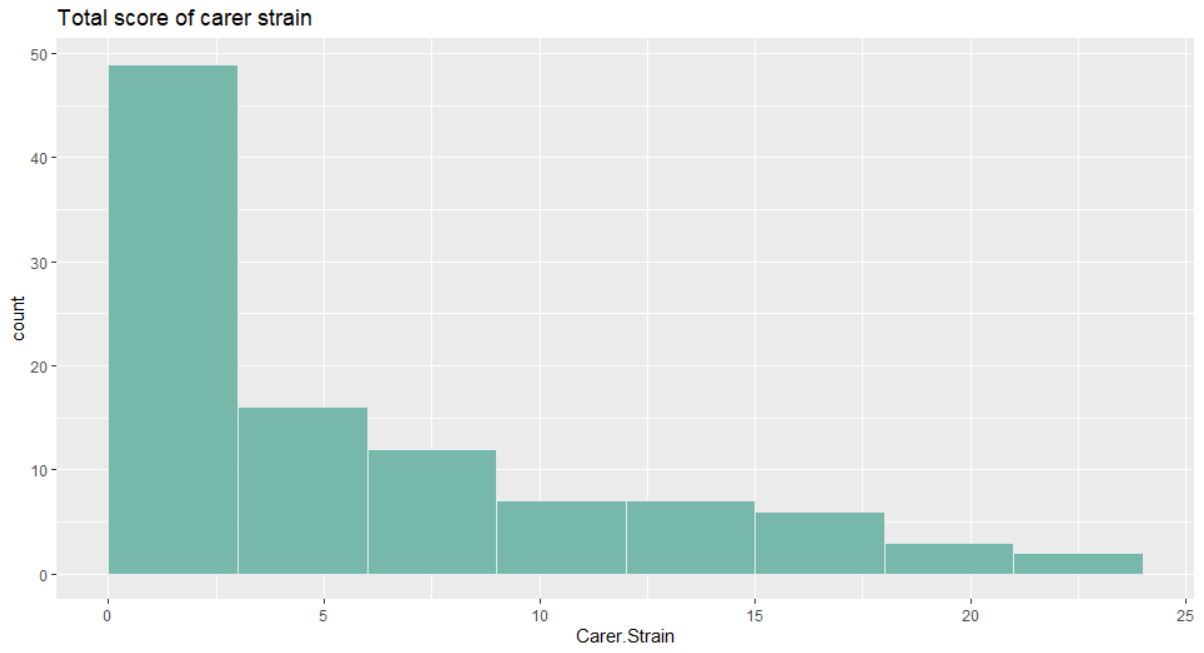

Supplemental Figure 1 Histogram of MCSI total score

Supplement: bmjopen-14-12-s001.pdf [file bmjopen-14-12-s001.pdf]

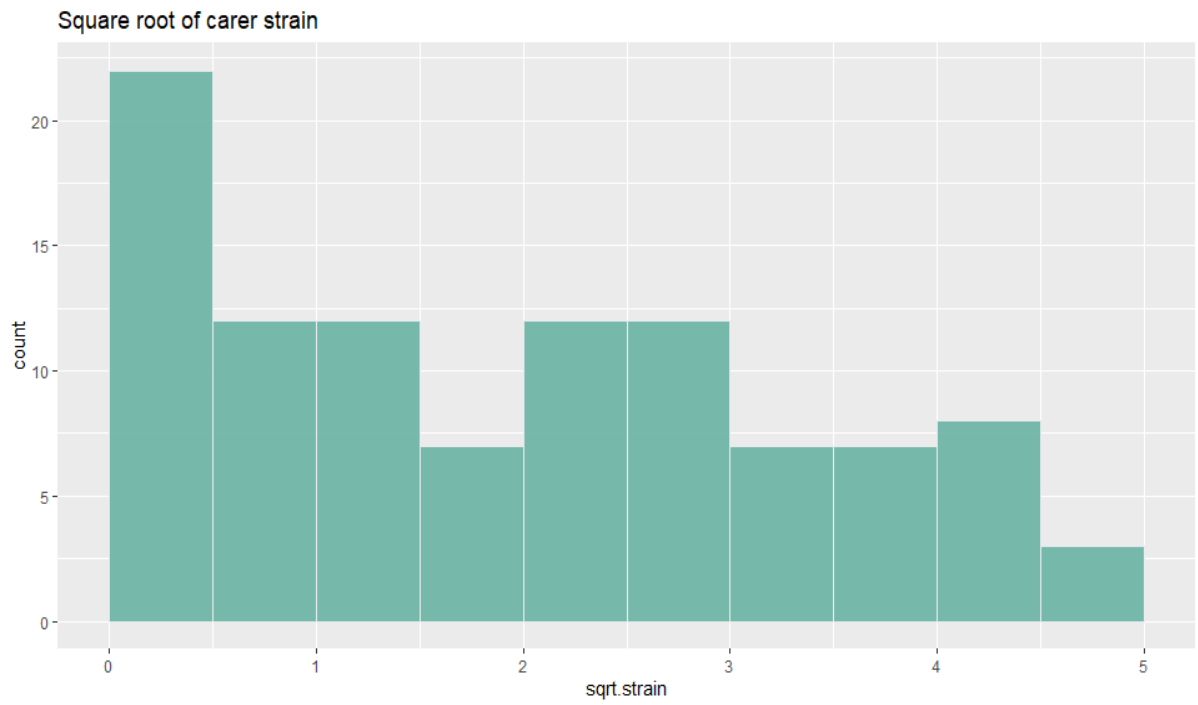

Supplemental Figure 2 Histogram of square root transformed MCSI total score

Supplement: bmjopen-14-12-s002.pdf [file bmjopen-14-12-s002.pdf]
